# Supplementary material
Source: PubMed Central journal article supplement (PMC3787943)
Supplement: NIHMS512699-supplement-1_si_001.pdf [file NIHMS512699-supplement-1_si_001.pdf]

## Supporting Information

### **H<sub>4</sub>octapa-Trastuzumab: Versatile Acyclic Chelate System for <sup>111</sup>In and <sup>177</sup>Lu Imaging and Therapy**

Eric W. Price<sup>†,§</sup>, Brian M. Zeglis<sup>‡</sup>, Jacqueline F. Cawthray<sup>†,§</sup>, Caterina F. Ramogida<sup>†,§</sup>, Nicholas Ramos<sup>‡</sup>, Jason S. Lewis<sup>\*,‡</sup>, Michael J. Adam<sup>\*,§</sup>, and Chris Orvig<sup>\*,†</sup>

*†Medicinal Inorganic Chemistry Group, Department of Chemistry, University of British Columbia, 2036 Main Mall, Vancouver, British Columbia, Canada, V6T 1Z1.*

*§TRIUMF, 4004 Wesbrook Mall, Vancouver, British Columbia, Canada, V6T 2A3.*

*‡Department of Radiology and Program in Molecular Pharmacology and Chemistry, Memorial Sloan-Kettering Cancer Center, 1275 York Avenue, New York, New York, 10065, United States of America.*

## TABLE OF CONTENTS

|                                                                                                           |     |
|-----------------------------------------------------------------------------------------------------------|-----|
| 1) Supplementary Figure S1. <sup>1</sup> H NMR Spectrum <b>4</b> .....                                    | S3  |
| 2) Supplementary Figure S2. <sup>13</sup> C NMR Spectrum <b>4</b> .....                                   | S3  |
| 3) Supplementary Figure S3. <sup>1</sup> H NMR Spectrum <b>H<sub>4</sub>octapa (5)</b> .....              | S4  |
| 4) Supplementary Figure S4. <sup>13</sup> C NMR Spectrum <b>H<sub>4</sub>octapa (5)</b> .....             | S4  |
| 5) Supplementary Figure S5. <sup>1</sup> H NMR Spectrum <b>[Lu(octapa)]- (6)</b> .....                    | S5  |
| 6) Supplementary Figure S6. <sup>13</sup> C NMR Spectrum <b>[Lu(octapa)]- (6)</b> .....                   | S5  |
| 7) Supplementary Figure S7. <sup>1</sup> H NMR Spectrum <b>7</b> .....                                    | S6  |
| 8) Supplementary Figure S8. <sup>13</sup> C NMR Spectrum <b>7</b> .....                                   | S6  |
| 9) Supplementary Figure S9. <sup>1</sup> H NMR Spectrum <b>11</b> .....                                   | S7  |
| 10) Supplementary Figure S10. <sup>13</sup> C NMR Spectrum <b>11</b> .....                                | S7  |
| 11) Supplementary Figure S11. <sup>1</sup> H NMR Spectrum <b>p-SCN-Bn-H<sub>4</sub>octapa (12)</b> .....  | S8  |
| 12) Supplementary Figure S12. <sup>13</sup> C NMR Spectrum <b>p-SCN-Bn-H<sub>4</sub>octapa (12)</b> ..... | S8  |
| 13) Supplementary Figure S13. FT-ATIR Spectrum (neat) of <b>p-SCN-Bn-H<sub>4</sub>octapa (12)</b> .....   | S9  |
| 14) Supplementary Figure S14. Crude iTLC of <b><sup>111</sup>In-octapa-trastuzumab</b> .....              | S9  |
| 15) Supplementary Figure S15. Crude iTLC of <b><sup>177</sup>Lu-octapa-trastuzumab</b> .....              | S10 |
| 16) Supplementary Table S1. Biodistribution Data - %ID/g and Tumor/Tissue Ratios .....                    | S11 |
| 17) Supplementary Figure S16. Biodistribution Charts .....                                                | S12 |
| 18) Supplementary Table S2. P-Values from Students T-Test of Biodistribution Data .....                   | S12 |
| 19) Supplementary Table S3. Human Serum Stability of [Lu(chelate)] Complexes .....                        | S13 |
| 20) Supplementary Figure S17. SPECT/CT Images of <b><sup>111</sup>In-octapa-trastuzumab</b> .....         | S13 |
| 21) Supplementary Figure S18. SPECT/CT Images of <b><sup>111</sup>In-DOTA-trastuzumab</b> .....           | S14 |
| 22) Supplementary Figure S19. SPECT/CT Images of <b><sup>177</sup>Lu-octapa-trastuzumab</b> .....         | S15 |
| 23) Supplementary Figure S20. SPECT/CT Images of <b><sup>177</sup>Lu-DOTA-trastuzumab</b> .....           | S16 |
| 24) Supplementary Figure S21. Speciation Curve of <b>H<sub>4</sub>octapa (5)</b> .....                    | S17 |
| 25) Supplementary Figure S22. HPLC Chromatograph of Crude <b>p-SCN-Bn-H<sub>4</sub>octapa</b> .....       | S18 |

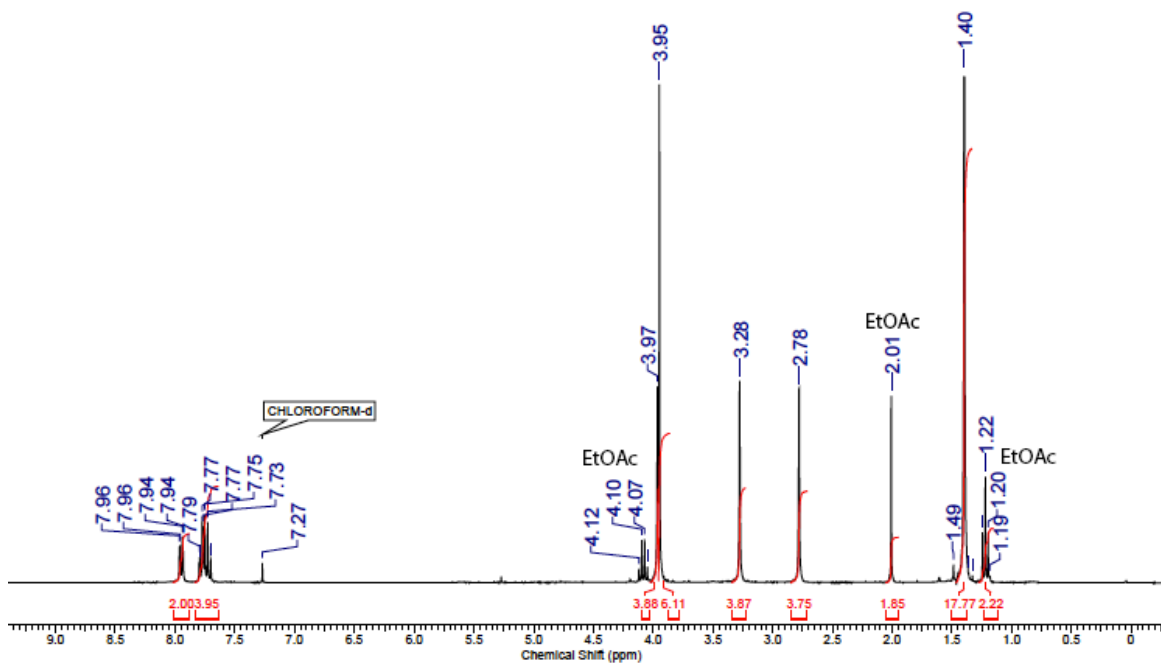

Supplementary Figure S1.  $^1\text{H}$  NMR spectrum (300 MHz,  $\text{CDCl}_3$ , RT) of **4**.

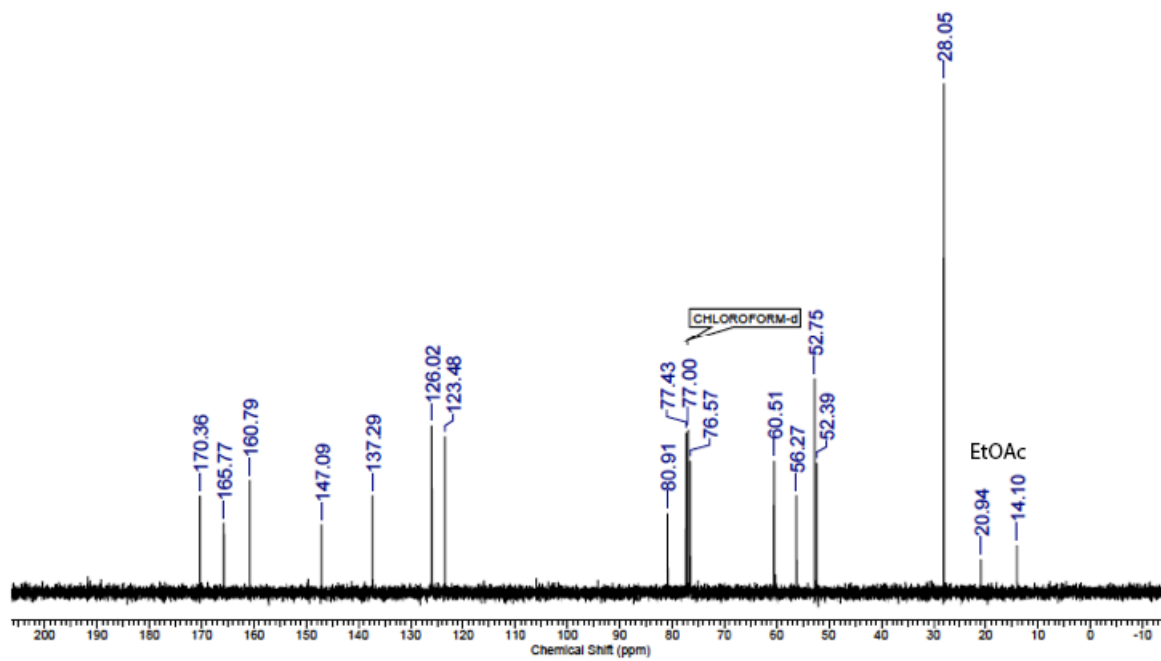

Supplementary Figure S2.  $^{13}\text{C}$  NMR spectrum (75 MHz,  $\text{CDCl}_3$ , RT) of **4**.

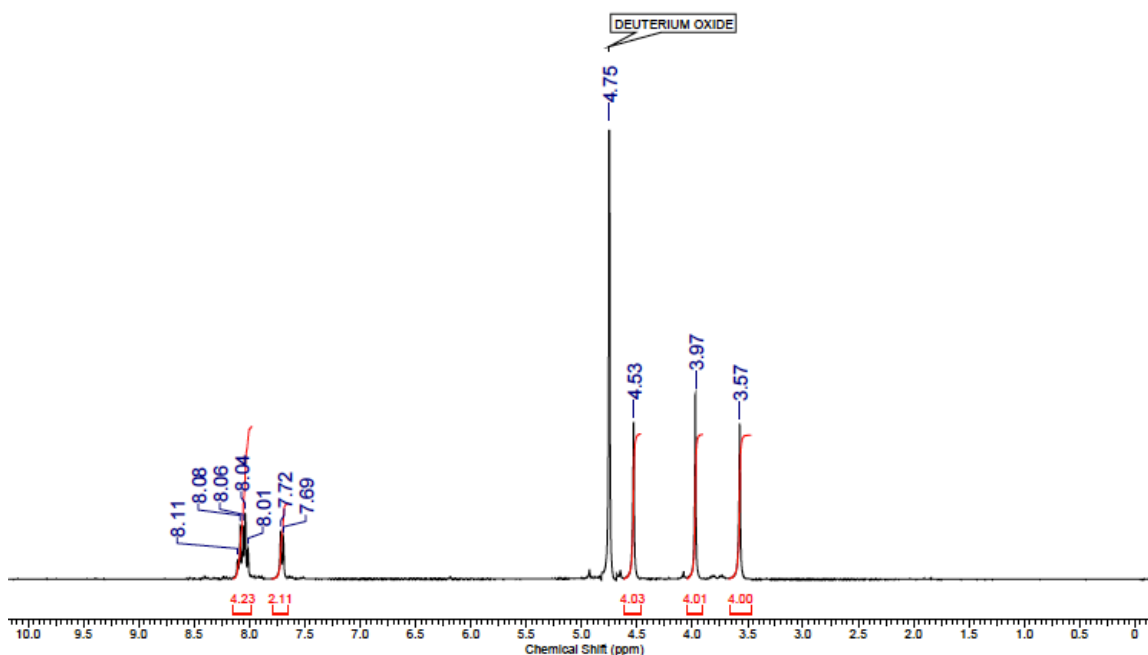

**Supplementary Figure S3.**  $^1\text{H}$  NMR spectrum (300 MHz,  $\text{D}_2\text{O}$ , RT) of  $\text{H}_4\text{octapa}$  (**5**).

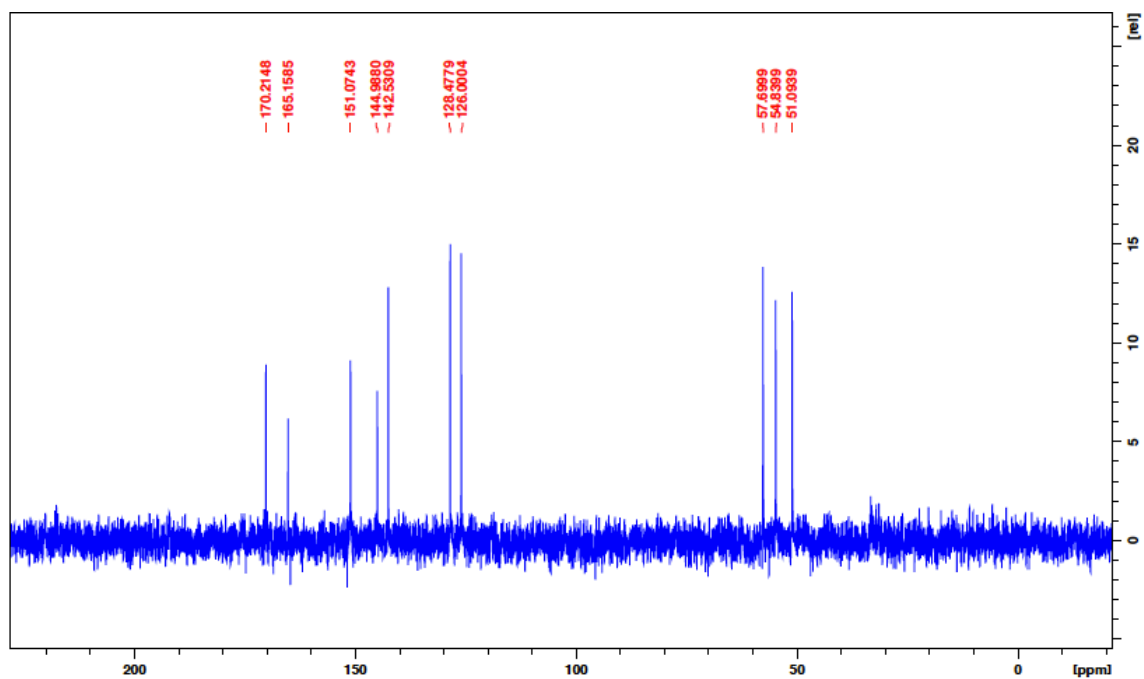

**Supplementary Figure S4.**  $^{13}\text{C}$  NMR spectrum (75 MHz,  $\text{D}_2\text{O}$ , RT) of  $\text{H}_4\text{octapa}$  (**5**), externally referenced to a solution of  $\text{MeOH}/\text{D}_2\text{O}$  (sr = -2.66).

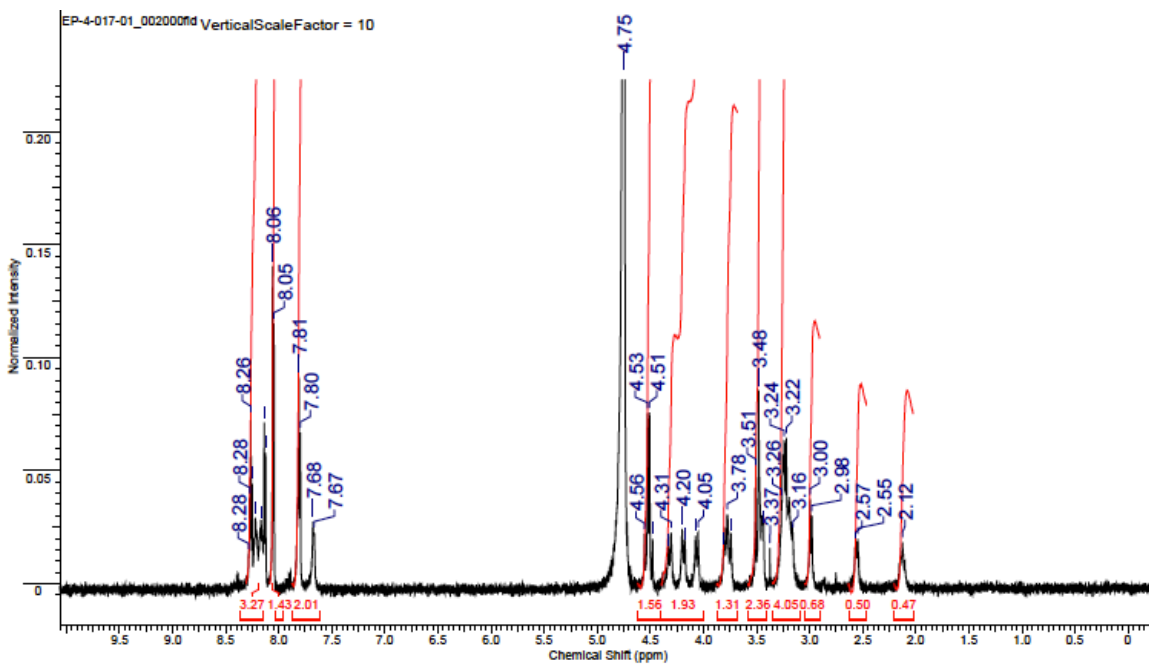

**Supplementary Figure S5.**  $^1\text{H}$  NMR spectrum (600 MHz,  $\text{D}_2\text{O}$ , RT) of  $[\text{Lu}(\text{octapa})]^-$  (6).

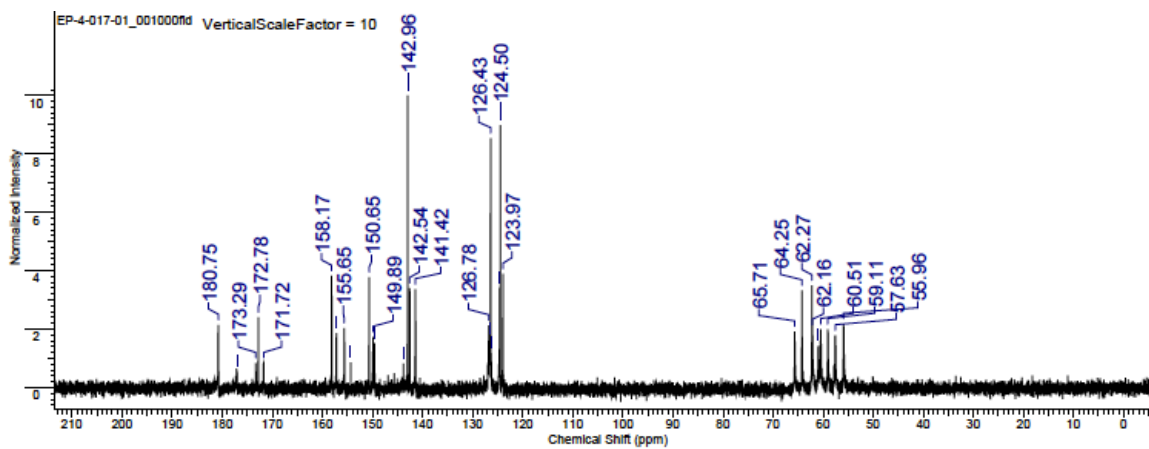

**Supplementary Figure S6.**  $^{13}\text{C}$  NMR spectrum (150 MHz,  $\text{D}_2\text{O}$ , RT) of  $[\text{Lu}(\text{octapa})]^-$  (6), externally referenced to a solution of  $\text{MeOH}/\text{D}_2\text{O}$ .

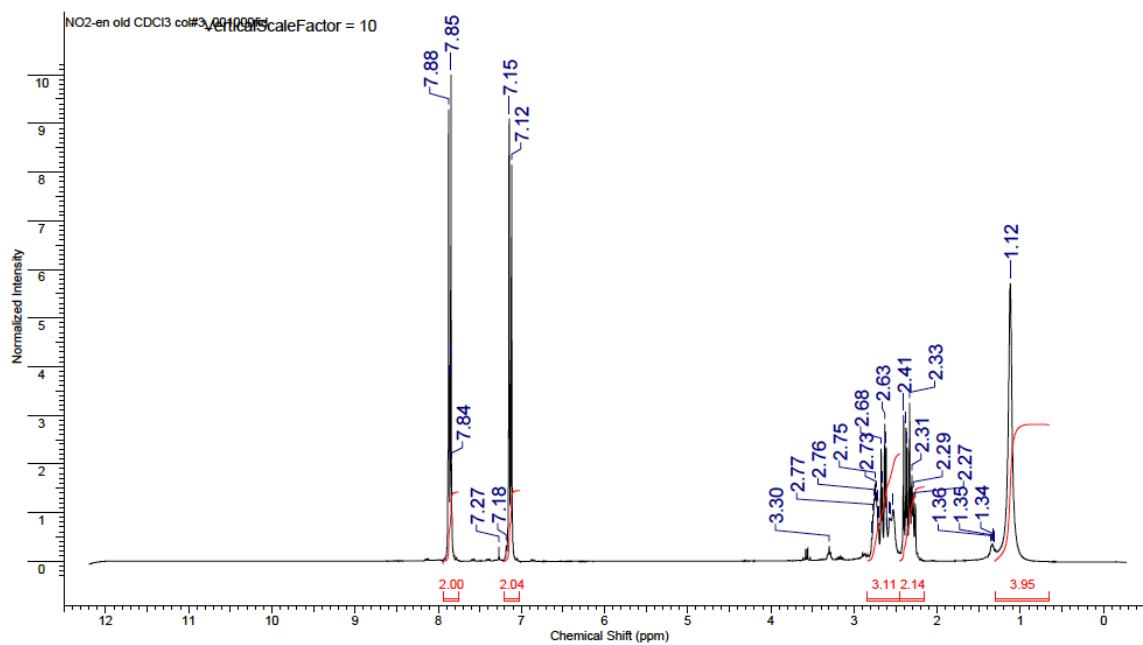

**Supplementary Figure S7.**  $^1\text{H}$  NMR spectrum (300 MHz,  $\text{CDCl}_3$ , RT) of **7**.

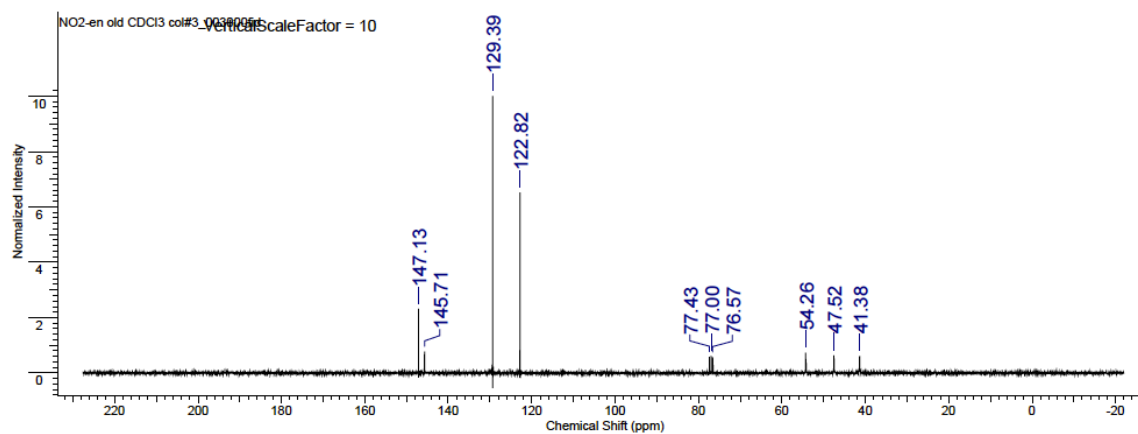

**Supplementary Figure S8.**  $^{13}\text{C}$  NMR spectrum (75 MHz,  $\text{CDCl}_3$ , RT) of **7**.

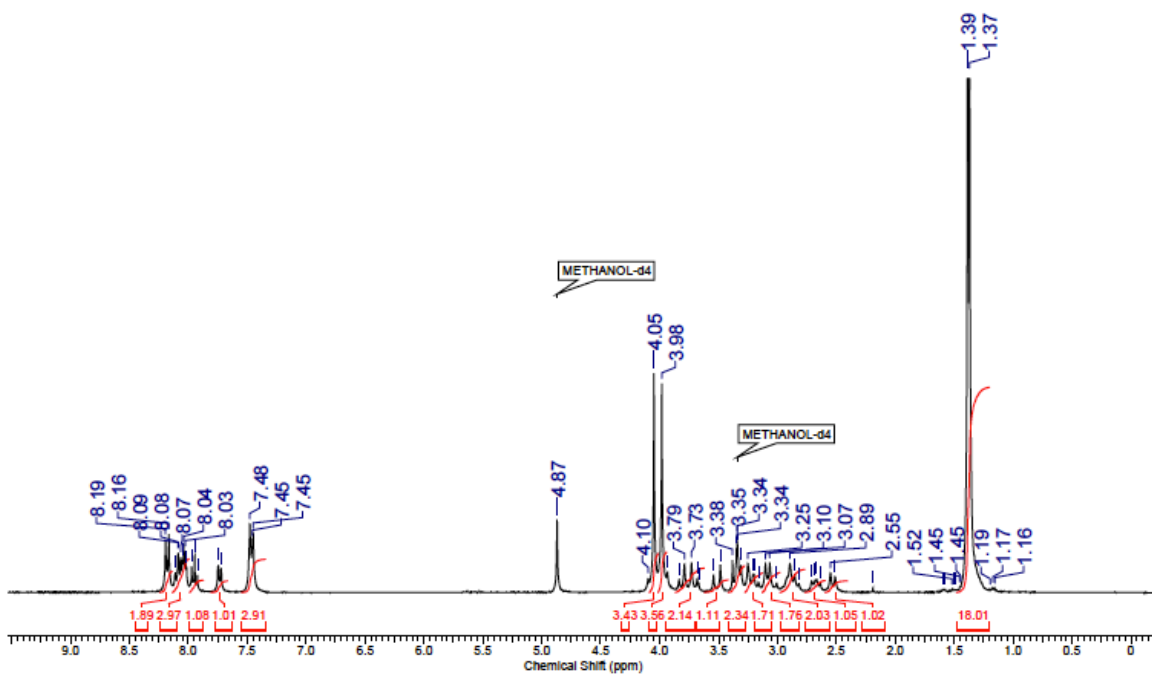

**Supplementary Figure S9.** <sup>1</sup>H NMR spectrum (300 MHz, MeOD, RT) of **11**.

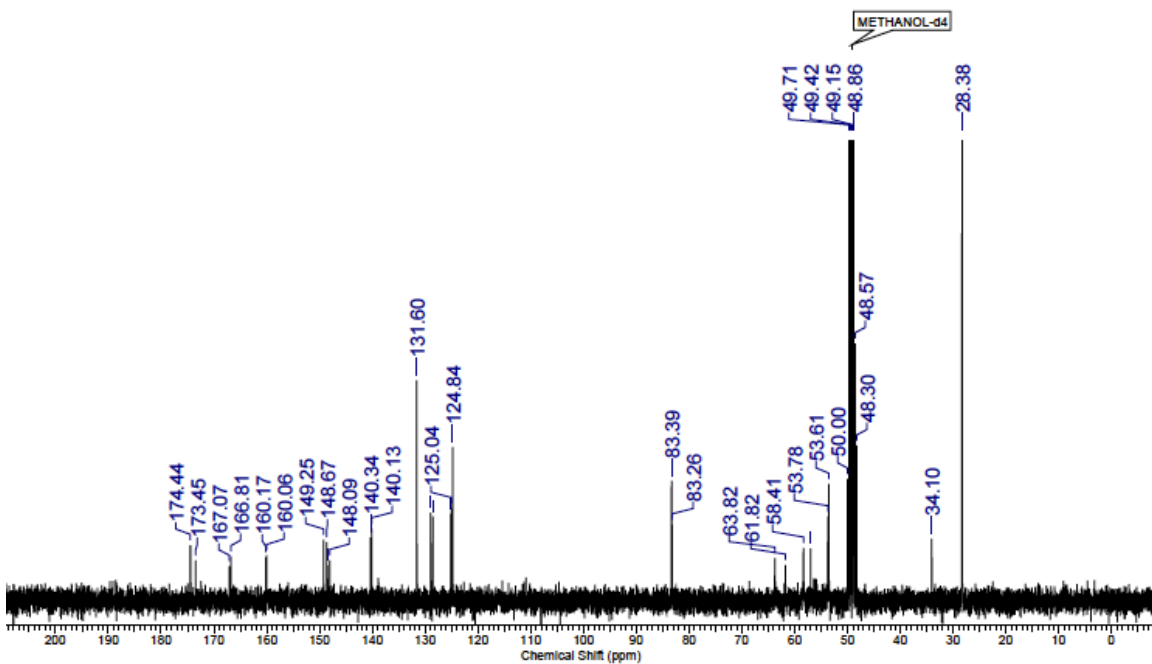

**Supplementary Figure S10.** <sup>13</sup>C NMR spectrum (75 MHz, MeOD, RT) of **11**.

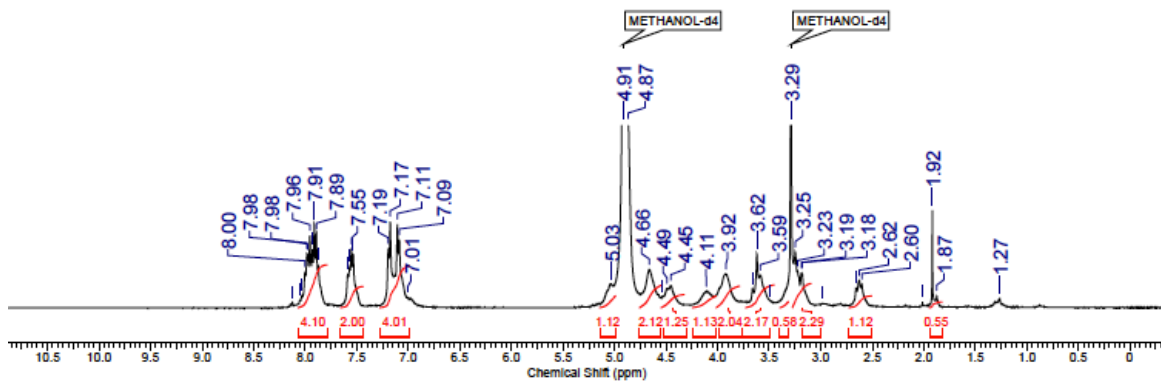

**Supplementary Figure S11.**  $^1\text{H}$  NMR spectrum (400 MHz, MeOD, RT) of *p*-SCN-Bn- $\text{H}_4$ octapa (12).

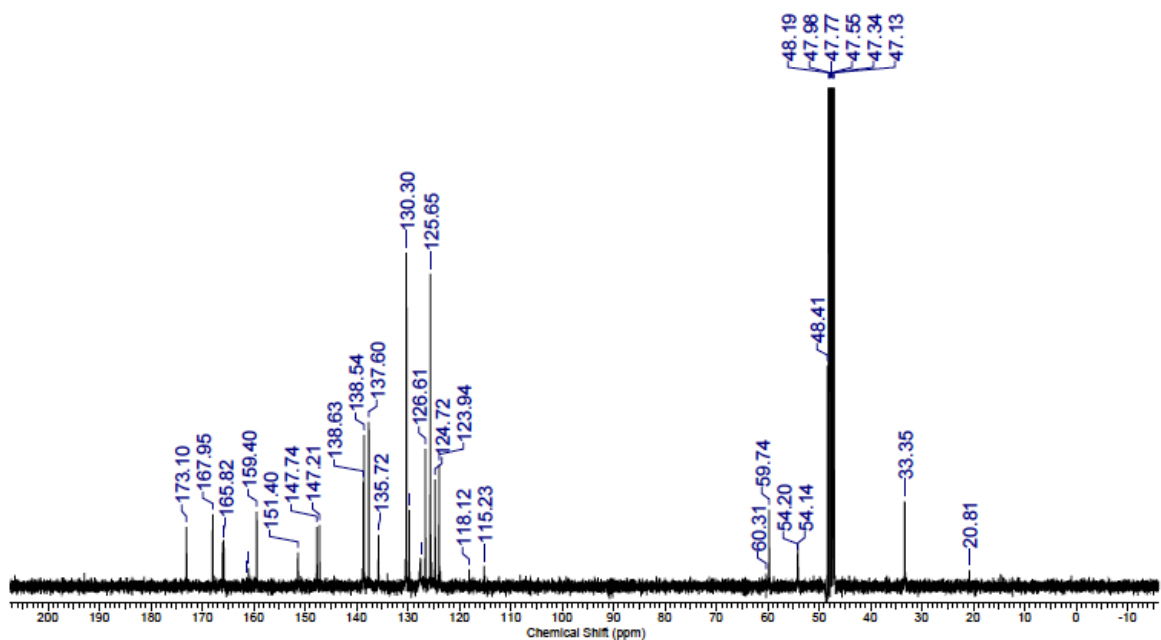

**Supplementary Figure S12.**  $^{13}\text{C}$  NMR spectrum (100 MHz, MeOD, RT) of *p*-SCN-Bn- $\text{H}_4$ octapa (12).



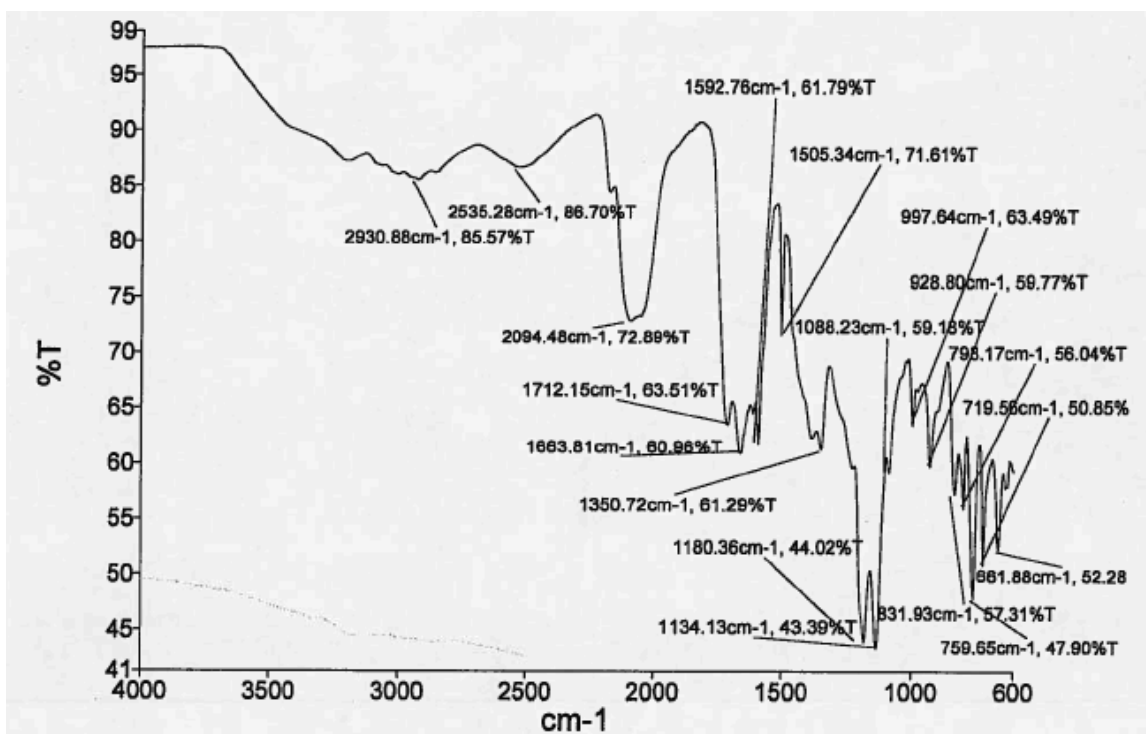

**Supplementary Figure S13.** FT-ATR-IR spectrum (neat) of *p*-SCN-Bn-H<sub>4</sub>octapa (**12**).

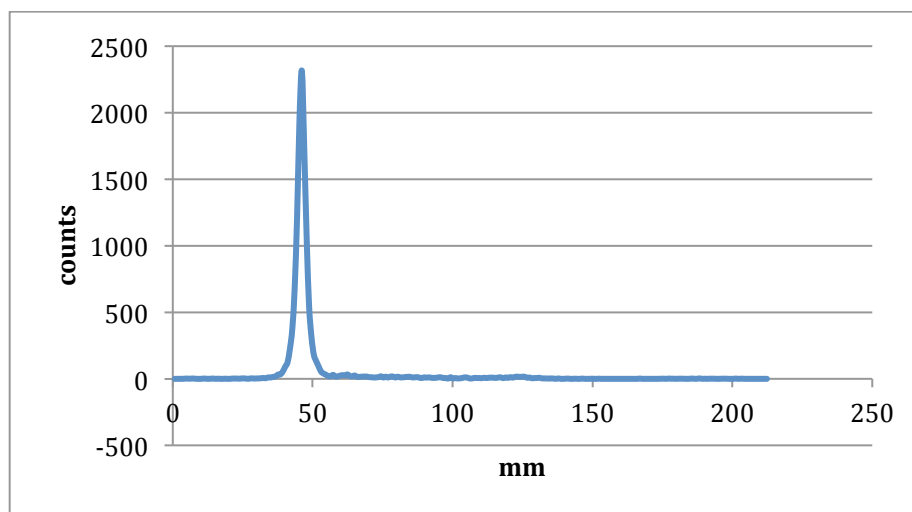

**Supplementary Figure S14.** Crude iTLC radiochromatogram of <sup>111</sup>In-octapa-trastuzumab (radiolabeled in NH<sub>4</sub>Ac buffer pH 5.5 100 mM, 15 min, RT and eluted with a mobile phase of 50 mM EDTA, pH 5) before purification, showing essentially quantitative radiolabeling yields. “Free” <sup>111</sup>In(EDTA) elutes near the solvent front ~150-200 mm.

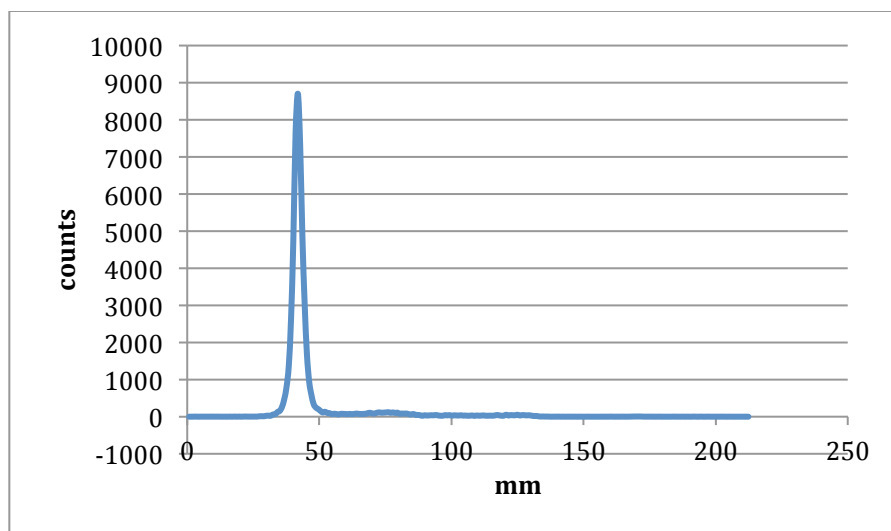

**Supplementary Figure S15.** Crude iTLC radiochromatograph of  $^{177}\text{Lu}$ -octapa-trastuzumab (radiolabeled in  $\text{NH}_4\text{Ac}$  buffer pH 5.5 100 mM, 15 min, RT and eluted with a mobile phase of 50 mM EDTA, pH 5) before purification, showing essentially quantitative radiolabeling yields. “Free”  $^{177}\text{Lu}(\text{EDTA})$  elutes near the solvent front ~150-200 mm.

| <sup>111</sup> In-octapa-trastuzumab Biodistribution |             |             |             |              |              | <sup>111</sup> In-DOTA-trastuzumab Biodistribution |             |             |             |             |             |
|------------------------------------------------------|-------------|-------------|-------------|--------------|--------------|----------------------------------------------------|-------------|-------------|-------------|-------------|-------------|
| Organ                                                | 24 h        | 48 h        | 72 h        | 96 h         | 120 h        | Organ                                              | 24 h        | 48 h        | 72 h        | 96 h        | 120 h       |
| Blood                                                | 6.9 ± 5.1   | 7.6 ± 6.5   | 10.5 ± 7.1  | 6.9 ± 6.6    | 11.4 ± 6     | Blood                                              | 18 ± 1.7    | 17.3 ± 2.6  | 16.8 ± 2.2  | 15 ± 3.6    | 14.3 ± 1.6  |
| Tumor                                                | 57.4 ± 22   | 58.3 ± 17.2 | 57.8 ± 14.6 | 68.7 ± 20.5  | 72.4 ± 21.3  | Tumor                                              | 22.3 ± 6.4  | 28.4 ± 5.2  | 30.6 ± 9.1  | 32.8 ± 7.3  | 31.5 ± 3.8  |
| Heart                                                | 2.6 ± 0.5   | 2.5 ± 1.5   | 2.7 ± 1.4   | 1.9 ± 1.4    | 3.6 ± 1.6    | Heart                                              | 6.1 ± 0.9   | 6.6 ± 2     | 5.6 ± 1.3   | 5.2 ± 1.8   | 5.2 ± 0.9   |
| Lungs                                                | 4.4 ± 2.1   | 3.9 ± 2.3   | 5 ± 2.8     | 3.8 ± 3.3    | 6.3 ± 3      | Lungs                                              | 7.2 ± 1.6   | 6.8 ± 3.3   | 5.2 ± 1.4   | 6.3 ± 1.2   | 5.7 ± 2.2   |
| Liver                                                | 12 ± 2.4    | 10.6 ± 1.2  | 9.1 ± 0.8   | 8.5 ± 2      | 6.6 ± 0.6    | Liver                                              | 6.2 ± 0.4   | 5.5 ± 1.4   | 4.8 ± 1.3   | 4.4 ± 1.7   | 5.2 ± 1.2   |
| Spleen                                               | 8.9 ± 2.4   | 7.6 ± 1     | 8.1 ± 0.8   | 7.4 ± 1.1    | 6.5 ± 1.6    | Spleen                                             | 3.6 ± 0.8   | 3.7 ± 1.6   | 3 ± 0.7     | 2.7 ± 0.7   | 3.4 ± 1.4   |
| Stomach                                              | 1.4 ± 0.2   | 0.8 ± 0.2   | 1.2 ± 0.1   | 0.7 ± 0.3    | 0.7 ± 0.2    | Stomach                                            | 0.7 ± 0.1   | 0.7 ± 0.4   | 0.8 ± 0.2   | 0.3 ± 0.2   | 0.6 ± 0.3   |
| Large Intestine                                      | 3.7 ± 0.4   | 2.5 ± 0.7   | 2 ± 0.9     | 1.7 ± 0.4    | 1.2 ± 0.1    | Large Intestine                                    | 0.5 ± 0.1   | 0.6 ± 0.1   | 0.7 ± 0.1   | 0.5 ± 0.1   | 0.5 ± 0.1   |
| Small Intestine                                      | 3.8 ± 0.7   | 2.1 ± 0.4   | 2.5 ± 0.6   | 2.1 ± 0.4    | 1.5 ± 0.1    | Small Intestine                                    | 1.9 ± 0.1   | 1.6 ± 0.5   | 1.7 ± 0.1   | 1.1 ± 0.2   | 1.3 ± 0.1   |
| Kidney                                               | 3.6 ± 1.2   | 4.2 ± 2.1   | 4.3 ± 2.1   | 3.5 ± 2      | 4.3 ± 1.6    | Kidney                                             | 5.3 ± 0.5   | 6.3 ± 0.9   | 5.1 ± 1.7   | 5.8 ± 1.7   | 4.9 ± 0.4   |
| Muscle                                               | 1.3 ± 0.5   | 0.9 ± 0.5   | 1 ± 0.5     | 0.8 ± 0.5    | 0.9 ± 0.5    | Muscle                                             | 0.7 ± 0.2   | 0.8 ± 0.3   | 0.5 ± 0.1   | 0.4 ± 0.1   | 0.3 ± 0.1   |
| Bone                                                 | 4.1 ± 2     | 3.5 ± 0.4   | 2.8 ± 1     | 3.3 ± 0.5    | 1.4 ± 0.3    | Bone                                               | 1 ± 0.3     | 0.9 ± 0.1   | 1.1 ± 0.4   | 0.9 ± 0.4   | 0.6 ± 0.2   |
| Skin                                                 | 10.8 ± 1.4  | 9.3 ± 1.4   | 7.2 ± 2.1   | 5.4 ± 1.2    | 3 ± 1.1      | Skin                                               | 1.8 ± 0.4   | 2.1 ± 0.7   | 2.6 ± 0.1   | 1.7 ± 0.8   | 2.2 ± 0.8   |
| Tumor/Tissue                                         | 24 h        | 48 h        | 72 h        | 96 h         | 120 h        | Tumor/Tissue                                       | 24 h        | 48 h        | 72 h        | 96 h        | 120 h       |
| Tumor/Blood                                          | 8.3 ± 7     | 7.7 ± 6.9   | 5.5 ± 3.9   | 10 ± 10      | 6.4 ± 3.8    | Tumor/Blood                                        | 1.2 ± 0.4   | 1.6 ± 0.4   | 1.8 ± 0.6   | 2.2 ± 0.7   | 2.2 ± 0.4   |
| Tumor/Heart                                          | 22.3 ± 9.5  | 23.6 ± 16   | 21.4 ± 12.3 | 35.8 ± 27.5  | 20.1 ± 10.9  | Tumor/Heart                                        | 3.6 ± 1.2   | 4.3 ± 1.5   | 5.5 ± 2.1   | 6.3 ± 2.6   | 6 ± 1.2     |
| Tumor/Lung                                           | 13.1 ± 8    | 15.1 ± 10   | 11.6 ± 7.3  | 17.9 ± 16.4  | 11.5 ± 6.3   | Tumor/Lung                                         | 3.1 ± 1.1   | 4.2 ± 2.2   | 5.9 ± 2.4   | 5.2 ± 1.5   | 5.5 ± 2.2   |
| Tumor/Liver                                          | 4.8 ± 2.1   | 5.5 ± 1.7   | 6.4 ± 1.7   | 8.1 ± 3.1    | 10.9 ± 3.4   | Tumor/Liver                                        | 3.6 ± 1.1   | 5.1 ± 1.6   | 6.4 ± 2.5   | 7.5 ± 3.3   | 6.1 ± 1.5   |
| Tumor/Spleen                                         | 6.5 ± 3     | 7.7 ± 2.5   | 7.1 ± 1.9   | 9.3 ± 3.1    | 11.1 ± 4.2   | Tumor/Spleen                                       | 6.2 ± 2.2   | 7.6 ± 3.6   | 10.3 ± 4    | 12 ± 4.2    | 9.2 ± 3.9   |
| Tumor/Stomach                                        | 40.8 ± 16.9 | 76.1 ± 28.6 | 46.6 ± 12.9 | 92.6 ± 48.5  | 103.3 ± 43.3 | Tumor/Stomach                                      | 32.7 ± 11.7 | 41.9 ± 26.2 | 40.3 ± 15.8 | 98.3 ± 52.2 | 49.9 ± 21.2 |
| Tumor/LI                                             | 15.5 ± 6.2  | 23.2 ± 9.3  | 28.9 ± 14.5 | 39.8 ± 15.4  | 59.4 ± 18.6  | Tumor/LI                                           | 43.6 ± 17.5 | 46.1 ± 12.3 | 46.2 ± 16.5 | 63.6 ± 19.9 | 63.5 ± 12.4 |
| Tumor/SI                                             | 15 ± 6.3    | 27.5 ± 9.6  | 23 ± 7.9    | 33.4 ± 12.3  | 48 ± 14.8    | Tumor/SI                                           | 11.8 ± 3.5  | 17.3 ± 6.4  | 17.9 ± 5.4  | 28.7 ± 8.8  | 23.7 ± 3    |
| Tumor/Kidney                                         | 16.1 ± 8.3  | 14 ± 8.1    | 13.3 ± 7.3  | 19.6 ± 12.5  | 16.9 ± 8     | Tumor/Kidney                                       | 4.2 ± 1.2   | 4.5 ± 1     | 6.1 ± 2.7   | 5.7 ± 2.1   | 6.4 ± 0.9   |
| Tumor/Muscle                                         | 44.7 ± 23.7 | 64.7 ± 42.2 | 56.8 ± 33.2 | 89.3 ± 59.1  | 78.9 ± 52.2  | Tumor/Muscle                                       | 33.2 ± 13.3 | 36.7 ± 14.9 | 63.4 ± 26.4 | 79.6 ± 26.5 | 90 ± 22.8   |
| Tumor/Bone                                           | 14 ± 8.7    | 16.5 ± 5.2  | 20.8 ± 9.1  | 20.7 ± 6.9   | 50.4 ± 18.2  | Tumor/Bone                                         | 22 ± 8.9    | 32 ± 7.6    | 29 ± 13.6   | 38.3 ± 21.6 | 48.6 ± 18.5 |
| Tumor/Skin                                           | 5.3 ± 2.2   | 6.3 ± 2.1   | 8 ± 3.1     | 12.8 ± 4.8   | 24.2 ± 11.5  | Tumor/Skin                                         | 12.3 ± 4.6  | 13.6 ± 5    | 11.7 ± 3.5  | 19.4 ± 9.8  | 14.6 ± 5.5  |
| <sup>177</sup> Lu-octapa-trastuzumab                 |             |             |             |              |              | <sup>177</sup> Lu-DOTA-trastuzumab                 |             |             |             |             |             |
| Organ                                                | 24 h        | 48 h        | 72 h        | 96 h         | 120 h        | Organ                                              | 24 h        | 48 h        | 72 h        | 96 h        | 120 h       |
| Blood                                                | 19.1 ± 1.5  | 9.1 ± 9.5   | 9.7 ± 5.2   | 8.9 ± 6.9    | 7.6 ± 5.7    | Blood                                              | 20.4 ± 1.7  | 17.4 ± 1    | 18.1 ± 2.8  | 15 ± 0.8    | 14.7 ± 0.7  |
| Tumor                                                | 50 ± 5.4    | 63.5 ± 15   | 62.4 ± 20   | 70.4 ± 25.8  | 56.6 ± 12.7  | Tumor                                              | 18.3 ± 4.8  | 31.6 ± 2.9  | 32.1 ± 7.4  | 37 ± 9.5    | 37.4 ± 10.3 |
| Heart                                                | 4.2 ± 0.7   | 3.2 ± 1.9   | 2.5 ± 0.9   | 2.3 ± 0.7    | 2.6 ± 1.4    | Heart                                              | 7.2 ± 1     | 4.9 ± 3.3   | 5.8 ± 1.6   | 4.6 ± 1.1   | 5.4 ± 0.6   |
| Lung                                                 | 7.8 ± 3.6   | 3.9 ± 3.1   | 5 ± 2.3     | 4.4 ± 2.5    | 2.7 ± 1.8    | Lungs                                              | 10 ± 1.5    | 6.7 ± 4.6   | 7.1 ± 2.3   | 6.3 ± 0.6   | 6 ± 2.1     |
| Liver                                                | 10.1 ± 1.3  | 13.2 ± 4    | 9.5 ± 3.5   | 9.8 ± 1.7    | 8 ± 2.6      | Liver                                              | 4.5 ± 2     | 5.7 ± 3.6   | 5.7 ± 2.5   | 2.8 ± 0.9   | 3.7 ± 1.9   |
| Spleen                                               | 8.8 ± 2.3   | 11.5 ± 2.5  | 7.4 ± 2.8   | 9.2 ± 1.2    | 6.7 ± 2.4    | Spleen                                             | 3.8 ± 0.5   | 3.1 ± 2.9   | 3.2 ± 1     | 3.5 ± 0.4   | 3.8 ± 1     |
| Stomach                                              | 1.4 ± 0.3   | 1 ± 0.5     | 0.9 ± 0.4   | 1.1 ± 0.3    | 0.6 ± 0.2    | Stomach                                            | 0.7 ± 0.2   | 1.3 ± 1.9   | 0.9 ± 0.2   | 0.8 ± 0.2   | 0.7 ± 0.2   |
| Large Intestine                                      | 1.3 ± 0.3   | 1 ± 0.3     | 1.1 ± 0.5   | 1.1 ± 0.2    | 0.8 ± 0.2    | Large Intestine                                    | 0.6 ± 0.1   | 0.5 ± 0.3   | 0.8 ± 0.2   | 0.5 ± 0.1   | 0.6 ± 0.2   |
| Small Intestine                                      | 1.9 ± 0.5   | 2.5 ± 1.1   | 2 ± 0.9     | 2.3 ± 0.4    | 1.6 ± 0.4    | Small Intestine                                    | 1.7 ± 0.2   | 1.5 ± 1     | 1.5 ± 0.4   | 1.4 ± 0.3   | 1.2 ± 0.1   |
| Kidney                                               | 4.9 ± 0.9   | 3.8 ± 2     | 3.7 ± 1.2   | 3.8 ± 1.8    | 2.8 ± 1.2    | Kidney                                             | 5.5 ± 1.7   | 7.3 ± 0.7   | 5.1 ± 0.8   | 4.4 ± 0.2   | 7.1 ± 5     |
| Muscle                                               | 0.9 ± 0.2   | 0.7 ± 0.5   | 0.8 ± 0.5   | 0.5 ± 0.2    | 0.4 ± 0.2    | Muscle                                             | 0.7 ± 0.2   | 0.5 ± 0.4   | 0.5 ± 0.1   | 0.5 ± 0.2   | 0.5 ± 0.1   |
| Bone                                                 | 3.2 ± 0.5   | 4 ± 0.6     | 3.1 ± 0.7   | 4.2 ± 1.5    | 3.6 ± 1.7    | Bone                                               | 1.2 ± 0     | 1.3 ± 0.8   | 1.3 ± 0.3   | 0.9 ± 0.2   | 1.4 ± 0.3   |
| Skin                                                 | 8.4 ± 2     | 6.8 ± 2.9   | 6.9 ± 0.5   | 5.6 ± 1.2    | 4.1 ± 2.2    | Skin                                               | 1.9 ± 0.9   | 2.4 ± 1.7   | 2.1 ± 0.2   | 2.1 ± 0.7   | 3.1 ± 1.3   |
| Tumor/Tissue                                         | 24 h        | 48 h        | 72 h        | 96 h         | 120 h        | Tumor/Tissue                                       | 24 h        | 48 h        | 72 h        | 96 h        | 120 h       |
| Tumor/Blood                                          | 2.6 ± 0.3   | 7 ± 7.5     | 6.4 ± 4     | 7.9 ± 6.8    | 7.5 ± 5.8    | Tumor/Blood                                        | 0.9 ± 0.2   | 1.8 ± 0.2   | 1.8 ± 0.5   | 2.5 ± 0.7   | 2.5 ± 0.7   |
| Tumor/Heart                                          | 11.8 ± 2.4  | 20 ± 13.1   | 25.1 ± 11.9 | 31.3 ± 15.4  | 21.7 ± 12.4  | Tumor/Heart                                        | 2.5 ± 0.8   | 6.5 ± 4.5   | 5.5 ± 2     | 8 ± 2.9     | 7 ± 2.1     |
| Tumor/Lung                                           | 6.4 ± 3     | 16.3 ± 13.5 | 12.5 ± 7    | 16 ± 10.7    | 21 ± 14.9    | Tumor/Lung                                         | 1.8 ± 0.6   | 4.7 ± 3.3   | 4.5 ± 1.8   | 5.9 ± 1.6   | 6.2 ± 2.8   |
| Tumor/Liver                                          | 4.9 ± 0.8   | 4.8 ± 1.9   | 6.5 ± 3.2   | 7.2 ± 2.9    | 7.1 ± 2.8    | Tumor/Liver                                        | 4.1 ± 2.1   | 5.6 ± 3.5   | 5.7 ± 2.9   | 13.4 ± 5.7  | 10.2 ± 6    |
| Tumor/Spleen                                         | 5.7 ± 1.6   | 5.5 ± 1.8   | 8.5 ± 4.2   | 7.6 ± 3      | 8.4 ± 3.6    | Tumor/Spleen                                       | 4.8 ± 1.4   | 10 ± 9.4    | 9.9 ± 3.8   | 10.6 ± 3    | 9.8 ± 3.8   |
| Tumor/Stomach                                        | 36.2 ± 8    | 66.8 ± 40.3 | 71.7 ± 39.7 | 64.6 ± 29.5  | 92.8 ± 38.7  | Tumor/Stomach                                      | 27.4 ± 11.4 | 25.3 ± 37.9 | 34.6 ± 11.6 | 48.8 ± 16.1 | 52.1 ± 20.8 |
| Tumor/LI                                             | 40 ± 12     | 64.8 ± 24.3 | 55.2 ± 31.4 | 65.2 ± 27.9  | 69.9 ± 21.9  | Tumor/LI                                           | 31.9 ± 10   | 63.6 ± 39.3 | 42 ± 13     | 72.8 ± 20.8 | 61.7 ± 24.7 |
| Tumor/SI                                             | 27 ± 7.2    | 25.1 ± 12.4 | 31.5 ± 17.3 | 31 ± 12.4    | 34.7 ± 11.5  | Tumor/SI                                           | 10.7 ± 3.1  | 20.8 ± 14.2 | 20.8 ± 7.3  | 27.1 ± 9.2  | 30.5 ± 8.7  |
| Tumor/Kidney                                         | 10.2 ± 2.2  | 16.7 ± 9.6  | 16.9 ± 7.6  | 18.8 ± 11.1  | 20.3 ± 9.9   | Tumor/Kidney                                       | 3.4 ± 1.4   | 4.3 ± 0.6   | 6.3 ± 1.7   | 8.4 ± 2.2   | 5.3 ± 4     |
| Tumor/Muscle                                         | 53.1 ± 10.7 | 86.9 ± 64.6 | 74.3 ± 52   | 138.1 ± 65.1 | 157.3 ± 81.5 | Tumor/Muscle                                       | 28 ± 11.5   | 58.6 ± 39.5 | 71.5 ± 18.4 | 68.1 ± 27.6 | 74.3 ± 25.7 |
| Tumor/Bone                                           | 15.8 ± 2.9  | 16.1 ± 4.5  | 20.3 ± 8.2  | 16.7 ± 8.4   | 15.8 ± 8.4   | Tumor/Bone                                         | 15.1 ± 4    | 24.7 ± 16   | 24.2 ± 7.8  | 43.3 ± 14.5 | 26.4 ± 8.7  |
| Tumor/Skin                                           | 5.9 ± 1.6   | 9.4 ± 4.6   | 9.1 ± 3     | 12.5 ± 5.3   | 13.9 ± 8.3   | Tumor/Skin                                         | 9.4 ± 4.9   | 13.2 ± 9.5  | 15 ± 3.7    | 17.6 ± 7.1  | 11.9 ± 5.9  |

**Supplementary Table S1.** Biodistribution data from <sup>111</sup>In/<sup>177</sup>Lu-octapa-trastuzumab and <sup>111</sup>In/<sup>177</sup>Lu-DOTA-trastuzumab in female nude athymic mice (n = 4) with subcutaneous SKOV-3 xenografts (right shoulder, tumor volume ~ 100-150 mm<sup>3</sup>) showing organ uptake as % ID/g with relevant tumor/tissue ratios, with the error expressed as standard deviation (SD).

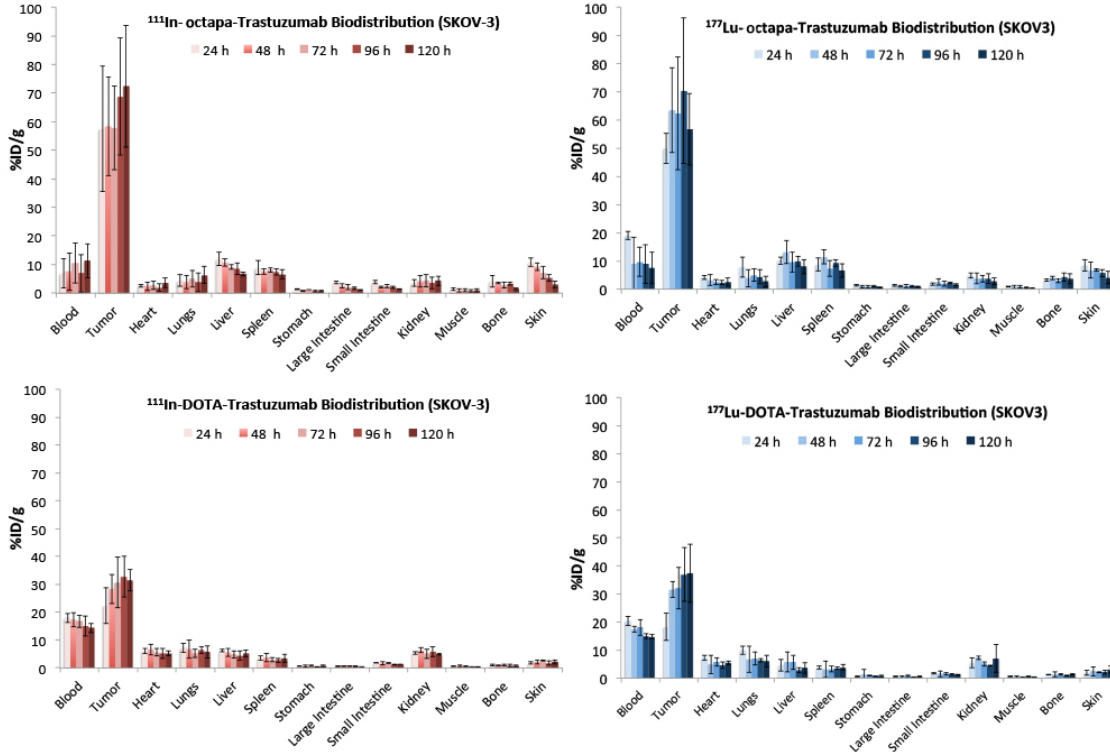

**Supplementary Figure S16.** Biodistribution data from <sup>111</sup>In/<sup>177</sup>Lu-octapa-trastuzumab and <sup>111</sup>In/<sup>177</sup>Lu-DOTA-trastuzumab in female nude athymic mice (n = 4) with subcutaneous SKOV-3 xenografts (right shoulder, 100-150 mm<sup>3</sup>) showing organ uptake as % ID/g, with the error expressed as standard deviation (SD), see Table 1 and Supplementary Tables S18 and S19 for data.

|                 | <sup>111</sup> In-octapa<br>DOTA-<br>Trastuzumab<br>72 h | <sup>177</sup> Lu-octapa<br>DOTA-<br>Trastuzumab<br>72 h | <sup>111</sup> In-octapa<br>DOTA-<br>Trastuzumab<br>96 h | <sup>177</sup> Lu-octapa<br>DOTA-<br>Trastuzumab<br>96 h | <sup>111</sup> In-octapa<br>DOTA-<br>Trastuzumab<br>120 h | <sup>177</sup> Lu-octapa<br>DOTA-<br>Trastuzumab<br>120 h |
|-----------------|----------------------------------------------------------|----------------------------------------------------------|----------------------------------------------------------|----------------------------------------------------------|-----------------------------------------------------------|-----------------------------------------------------------|
| Blood           | 0.094                                                    | 0.029                                                    | 0.052                                                    | 0.128                                                    | 0.316                                                     | 0.048                                                     |
| Tumor           | 0.027                                                    | 0.030                                                    | 0.038                                                    | 0.051                                                    | 0.033                                                     | 0.057                                                     |
| Heart           | 0.026                                                    | 0.011                                                    | 0.023                                                    | 0.014                                                    | 0.091                                                     | 0.010                                                     |
| Lungs           | 0.294                                                    | 0.254                                                    | 0.205                                                    | 0.199                                                    | 0.876                                                     | 0.054                                                     |
| Liver           | 0.041                                                    | 0.122                                                    | 0.002                                                    | 0.000                                                    | 0.026                                                     | 0.037                                                     |
| Spleen          | 0.000                                                    | 0.033                                                    | 0.001                                                    | 0.000                                                    | 0.027                                                     | 0.072                                                     |
| Stomach         | 0.056                                                    | 0.800                                                    | 0.936                                                    | 0.096                                                    | 0.916                                                     | 0.504                                                     |
| Large Intestine | 0.031                                                    | 0.234                                                    | 0.001                                                    | 0.004                                                    | 0.001                                                     | 0.147                                                     |
| Small Intestine | 0.036                                                    | 0.398                                                    | 0.041                                                    | 0.008                                                    | 0.013                                                     | 0.094                                                     |
| Kidney          | 0.531                                                    | 0.095                                                    | 0.403                                                    | 0.495                                                    | 0.331                                                     | 0.147                                                     |
| Muscle          | 0.080                                                    | 0.191                                                    | 0.385                                                    | 0.807                                                    | 0.185                                                     | 0.199                                                     |
| Bone            | 0.031                                                    | 0.005                                                    | 0.000                                                    | 0.004                                                    | 0.919                                                     | 0.047                                                     |
| Skin            | 0.003                                                    | 0.000                                                    | 0.012                                                    | 0.002                                                    | 0.872                                                     | 0.495                                                     |

**Supplementary Table S2.** P-values from a students two-tailed T-Test comparing the data sets (n = 4) of biodistribution %ID/g values between <sup>111</sup>In and <sup>177</sup>Lu radiolabeled H<sub>4</sub>octapa- and DOTA-based trastuzumab immunoconjugates.

| Complex                                   | Serum stability<br>1.5 h (%) | Serum stability<br>24 h (%) |
|-------------------------------------------|------------------------------|-----------------------------|
| [ <sup>177</sup> Lu(octapa)] <sup>-</sup> | 88.1 ± 1.2                   | 87.7 ± 0.7                  |
| [ <sup>177</sup> Lu(DOTA)] <sup>-</sup>   | 87.7 ± 0.7                   | 87.4 ± 2.1                  |
| [ <sup>177</sup> Lu(DTPA)] <sup>2-</sup>  | 77.4 ± 1.2                   | 81.6 ± 2.3                  |

**Supplementary Table S3.** Human blood serum stability assays of <sup>177</sup>Lu(chelate) complexes (37.5 °C), analyzed via PD-10 size exclusion column elution, with % stability expressed as the % intact radiometal complex (n = 3).

### <sup>111</sup>In-Octapa-trastuzumab

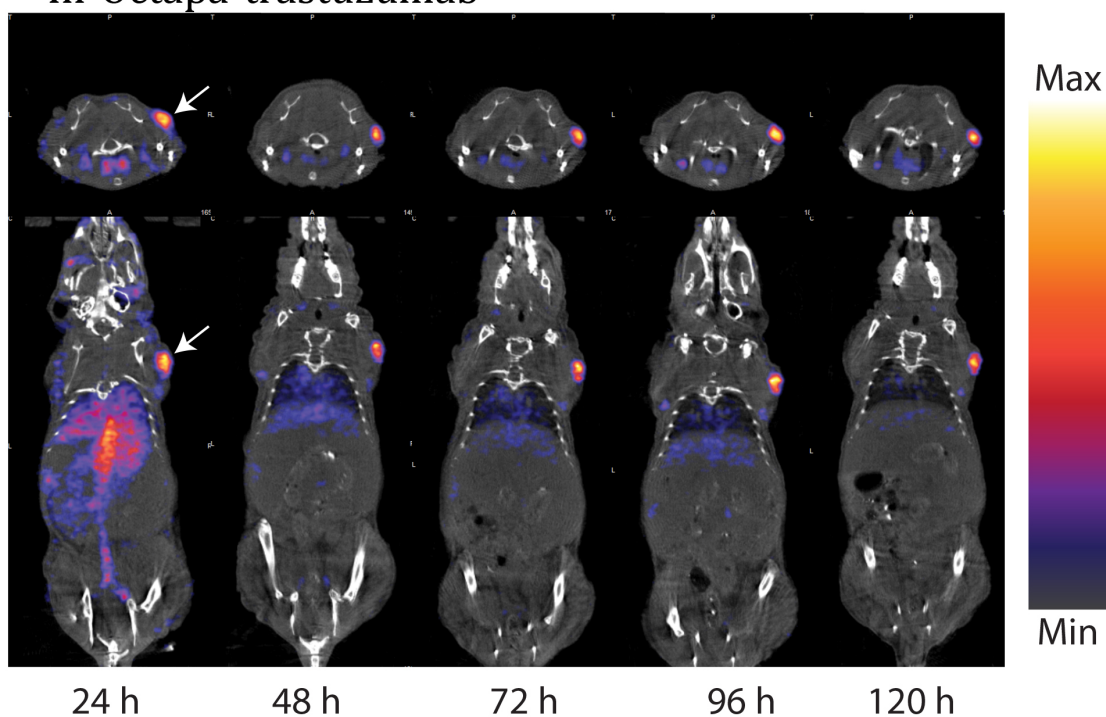

**Supplementary Figure S17.** SPECT/CT imaging of <sup>111</sup>In-octapa-trastuzumab in a female nude athymic mice (n = 2) bearing a subcutaneous SKOV-3 ovarian cancer xenograft (right shoulder, white arrow, tumor volume ~ 100-150 mm<sup>3</sup>). The transverse (top) and coronal (bottom) planar images bisect the tumor and were collected at 24, 48, 72, 96, and 120 h post injection.

$^{111}\text{In}$ -DOTA-trastuzumab

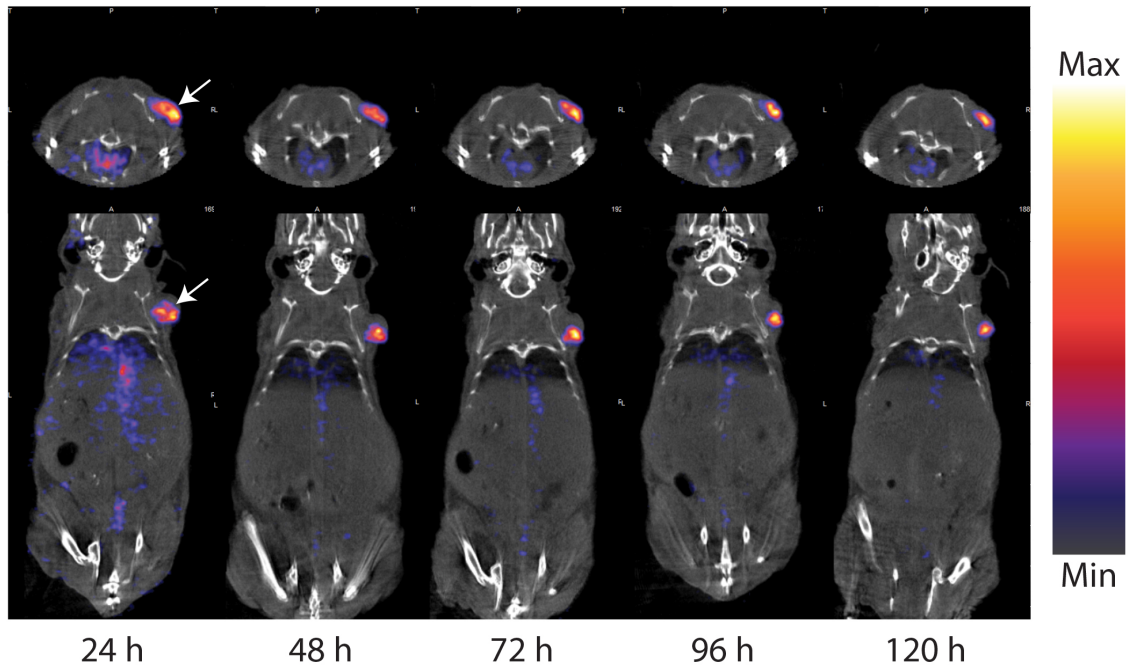

**Supplementary Figure S18.** SPECT/CT imaging of  $^{111}\text{In}$ -DOTA-trastuzumab in a female nude athymic mice ( $n = 2$ ) bearing a subcutaneous SKOV-3 ovarian cancer xenograft (right shoulder, white arrow, tumor volume  $\sim 100\text{-}150\text{ mm}^3$ ). The transverse (top) and coronal (bottom) planar images bisect the tumor and were collected at 24, 48, 72, 96, and 120 h post injection.

<sup>177</sup>Lu-Octapa-trastuzumab

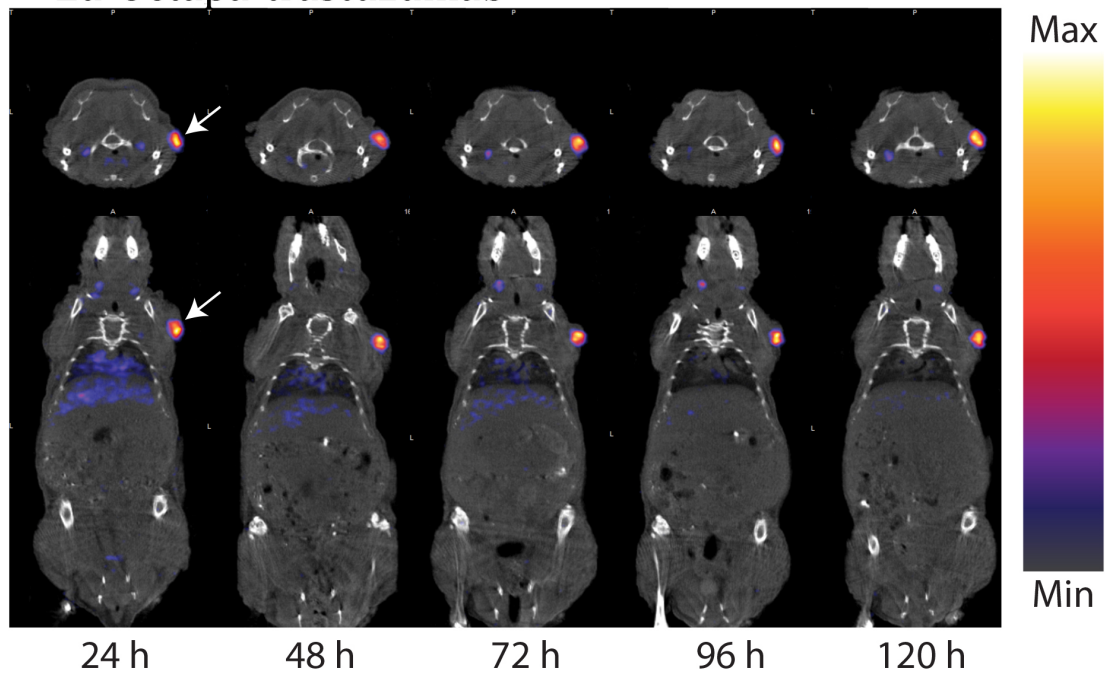

**Supplementary Figure S19.** SPECT/CT imaging of <sup>177</sup>Lu-octapa-trastuzumab in a female nude athymic mice (n = 2) bearing a subcutaneous SKOV-3 ovarian cancer xenograft (right shoulder, white arrow, tumor volume ~ 100-150 mm<sup>3</sup>). The transverse (top) and coronal (bottom) planar images bisect the tumor and were collected at 24, 48, 72, 96, and 120 h post injection.

## $^{177}\text{Lu}$ -DOTA-trastuzumab

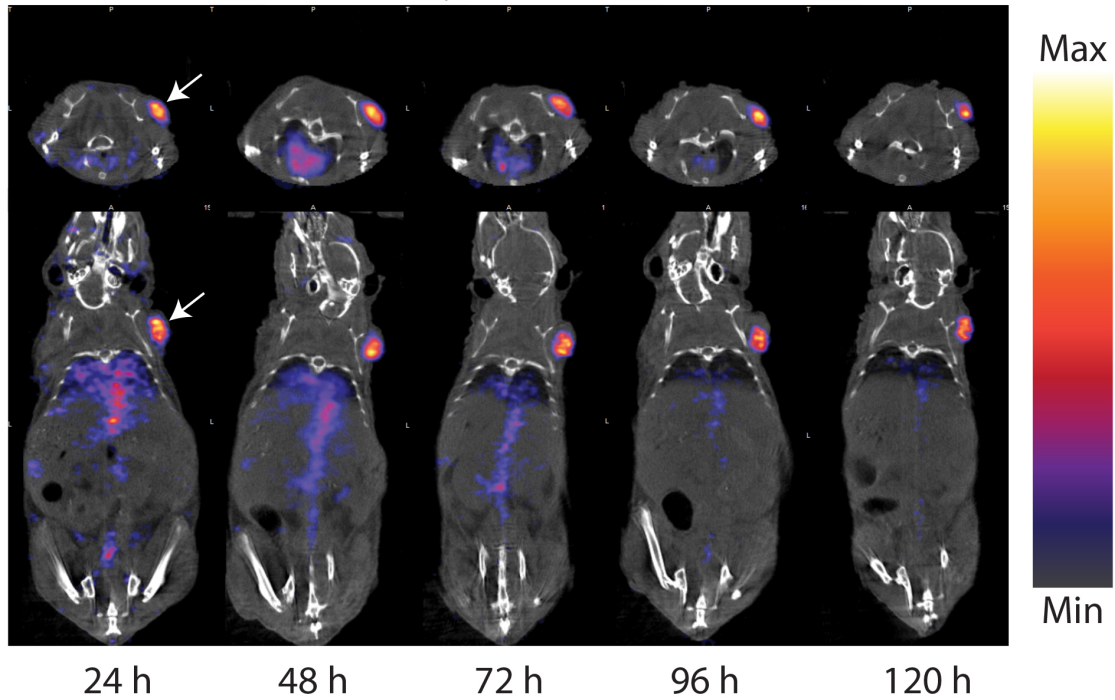

**Supplementary Figure S20.** SPECT/CT imaging of  $^{177}\text{Lu}$ -DOTA-trastuzumab in a female nude athymic mice ( $n = 2$ ) bearing a subcutaneous SKOV-3 ovarian cancer xenograft (right shoulder, white arrow, tumor volume  $\sim 100\text{-}150\text{ mm}^3$ ). The transverse (top) and coronal (bottom) planar images bisect the tumor and were collected at 24, 48, 72, 96, and 120 h post injection.



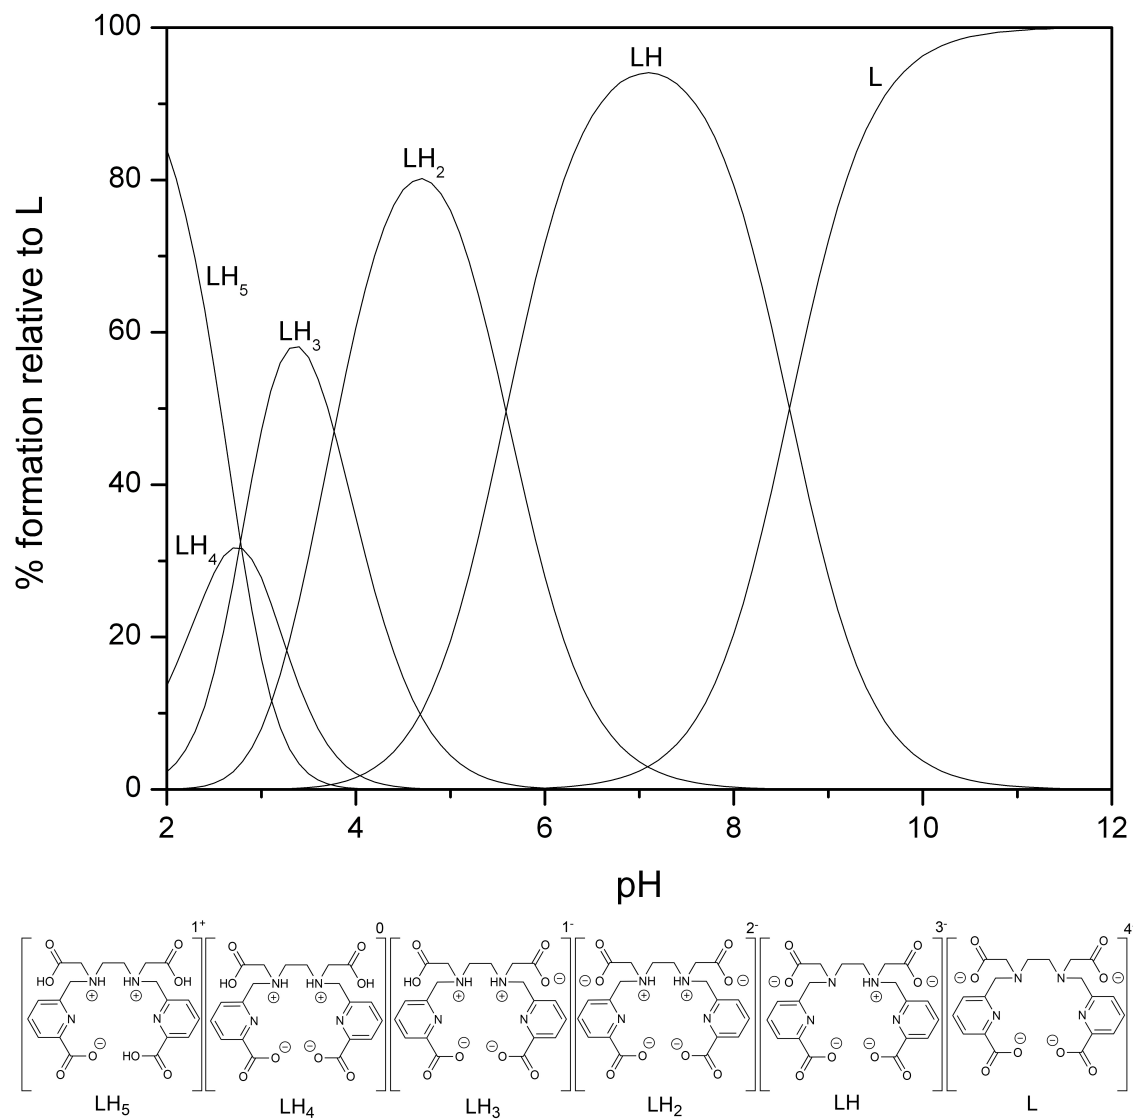

**Supplementary Figure S21.** H<sub>4</sub>octapa speciation curve, calculated from potentiometric titration experiments, showing the major species in solution at various pH, relative to 100% L.

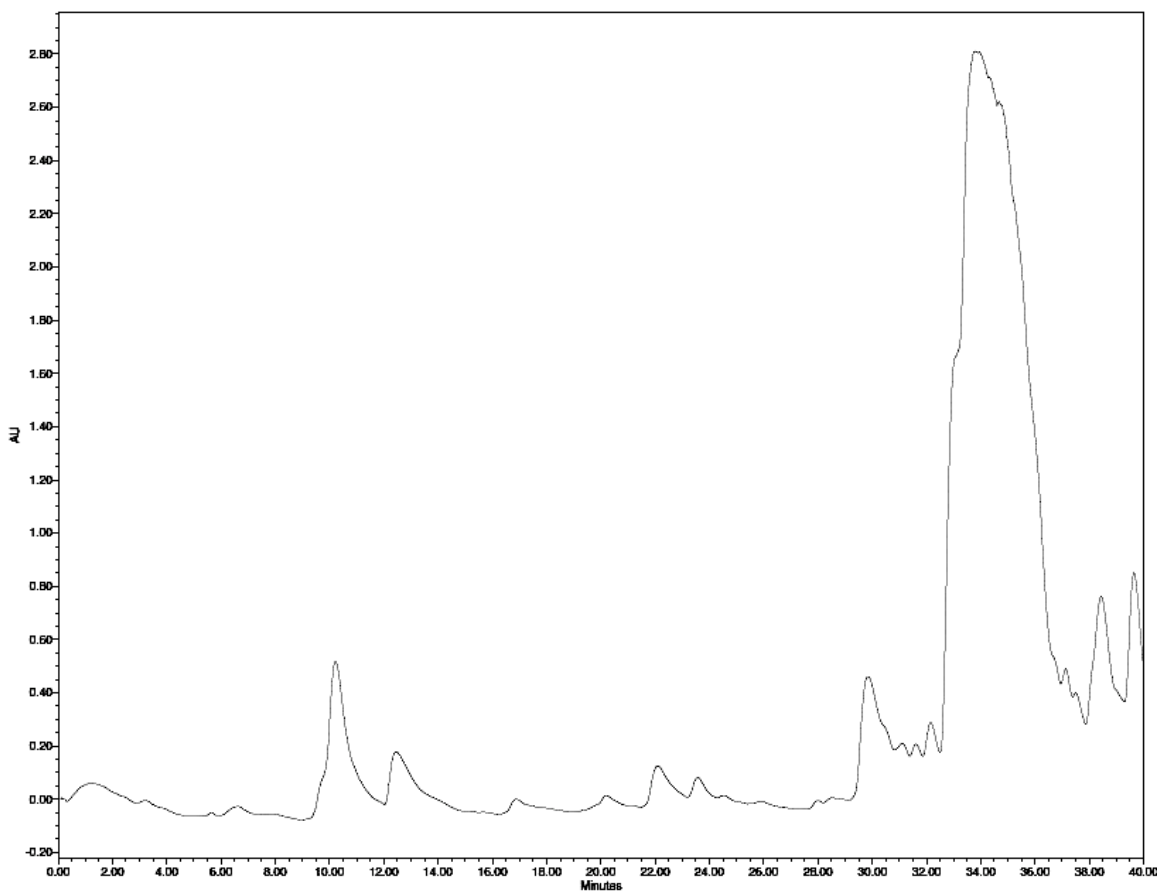

**Supplementary Figure S22.** Crude HPLC chromatogram of *p*-SCN-Bn-octapa purified on a semi-preparatory column (see experimental methods). The product elutes as a broad peak at  $t_R$  of 34 minutes.
